# Supplementary material for: Thiol for interfacial modification to improve the performance of lithium–sulfur batteries
Source: Royal Society of Chemistry journal article supplement (doi:10.1039/d2qm00863g), 2022-11-14
Supplement: d2qm00863g1.pdf [file d2qm00863g1.pdf]

## Thiol for interfacial modification to improve the performance of lithium-sulfur batteries

Chenyang Shi <sup>a</sup>, Shiyu Shao <sup>a</sup>, Chuanxin Zong <sup>a</sup>, Jiahao Gu <sup>a</sup>, Zeyu Huang <sup>a</sup>, Qiyu Wang<sup>a,\*</sup>, Bo Hong <sup>a,b</sup>, Mengran Wang <sup>a,b</sup>, Zhian Zhang <sup>a,b</sup>, Jie Li <sup>a,b</sup>, Yanqing Lai <sup>a,c</sup>

<sup>a</sup> School of Metallurgy and Environment, Central South University, Changsha 410083, Hunan, China

<sup>b</sup> Engineering Research Centre of Advanced Battery Materials, The Ministry of Education, Changsha 410083, Huanan, China

<sup>c</sup> Hunan Province Key Laboratory of Nonferrous Value-Added Metallurgy, Central South University, Changsha 410083, Hunan, China

\*Corresponding authors.

E-mail address: wangqiyucusu@163.com

### Supporting figures

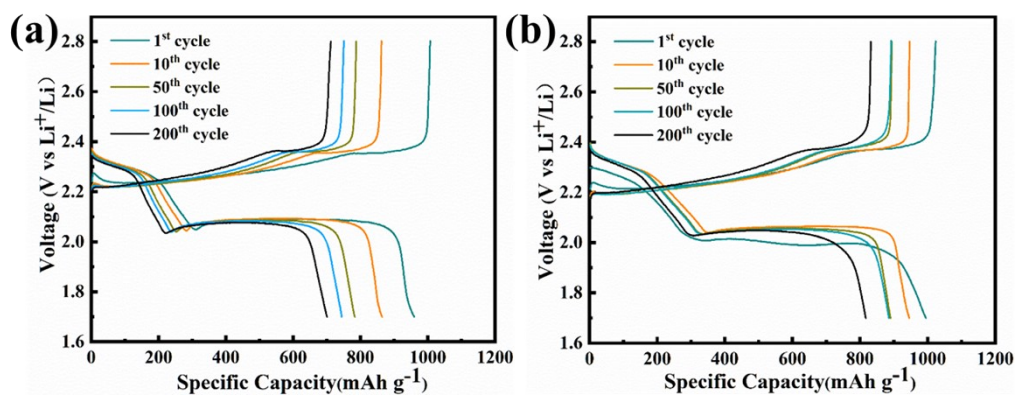

Fig S1. Charge/discharge curves of batteries with STD (a) and TBBT-containing electrolyte (b) at different number of cycles at 0.5C.

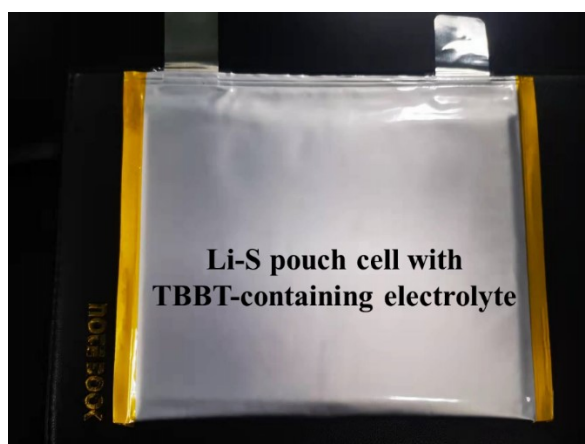

Fig S2. Image of the Li-S pouch cell with TMT-containing electrolyte.

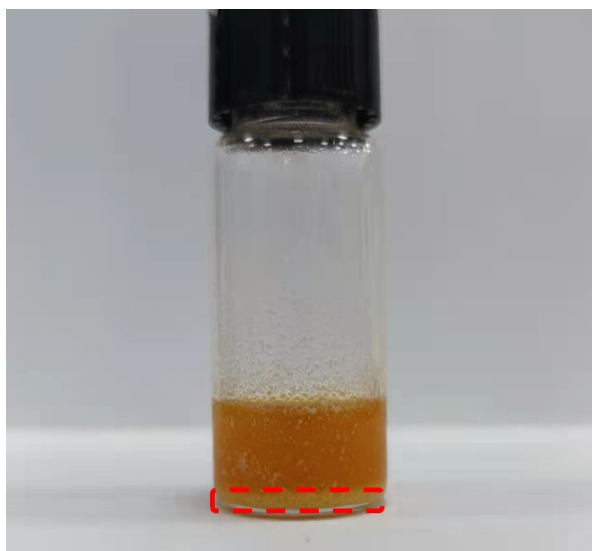

Fig S3. Photograph of solution after increasing  $\text{Li}_2\text{S}_6$  content into the TMT-containing electrolyte.

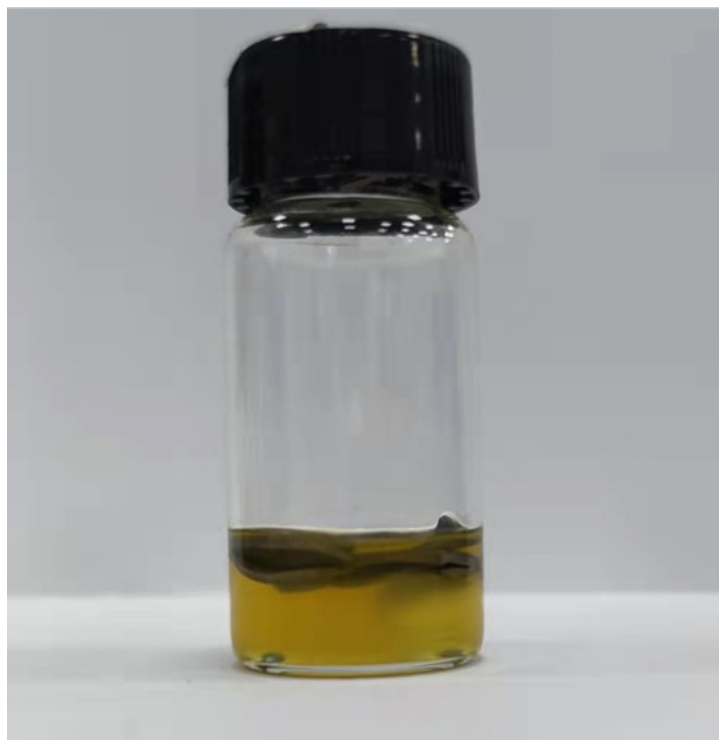

Fig S4. Digital image of the reaction solution between lithium and TBBT-containing electrolyte.

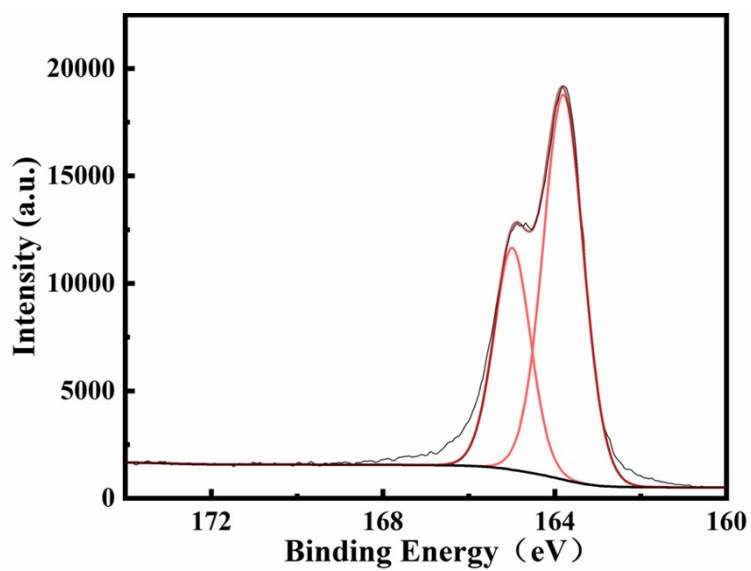

Fig S5. S 2p XPS spectra of TBBT-S<sub>n</sub>.
